# Supplementary material for: Ranking analysis of F-statistics for microarray data
Source: PubMed Central journal article supplement (PMC2323973; doi:10.1186/1471-2105-9-142), 2008-03-06
Supplement: 1471-2105-9-142-S1.pdf [file 1471-2105-9-142-S1.pdf]

Supplement table Genes with significant expression changes among four groups

| Accession   | F-value | Gene                                                                  | Accession     | F-value | Gene                                                                                          |
|-------------|---------|-----------------------------------------------------------------------|---------------|---------|-----------------------------------------------------------------------------------------------|
| X02002      | 135.805 | cell-surface glycoprotein                                             | U35099        | 27.073  | <b>complexin II</b>                                                                           |
| D64061      | 115.675 | annexin V-binding protein (ABP-7)                                     | D28111        | 26.421  | MOBP (myelin-associated oligodendrocytic basic protein)                                       |
| U41164      | 91.472  | <b>Cys2/His2 zinc finger protein (rKr1)</b>                           | X52772cds     | 25.894  | P65                                                                                           |
| rc_AI230256 | 85.863  | EST226951 Rattus norvegicus cDNA,                                     | rc_AA874934   | 25.841  | UI-R-E0-ci-c-05-0-ULs1 Rattus norvegicus cDNA                                                 |
| rc_AI638989 | 73.432  | rc_AI638989                                                           | M55291        | 25.577  | <b>receptor protein-tyrosine kinase (trkB)</b>                                                |
| D26307cds   | 72.673  | jun-D gene                                                            | X62145cds     | 25.291  | ribosomal protein L8                                                                          |
| X60212_i    | 64.678  | mammalian equivalent of bacterial large ribosomal subunit protein L22 | AF023621_at   | 25.078  | sortilin                                                                                      |
| rc_AA859837 | 62.971  | UI-R-E0-cc-g-09-0-ULs1 Rattus norvegicus cDNA                         | AB012234_g_at | 24.47   | NF1-X1                                                                                        |
| rc_AI013194 | 58.552  | EST207869 Rattus norvegicus cDNA                                      | L14851_at     | 24.284  | neurexin III-alpha                                                                            |
| rc_AA875506 | 57.965  | UI-R-E0-ct-c-05-0-ULs1 Rattus norvegicus cDNA                         | rc_AI237576   | 23.904  | EST234138 Rattus norvegicus cDNA                                                              |
| D28111      | 57.12   | D28111                                                                | rc_H31692     | 23.7    | EST106007 Rattus norvegicus cDNA                                                              |
| rc_AA875659 | 55.237  | UI-R-E0-ct-h-07-0-ULs1 Rattus norvegicus cDNA                         | D84477        | 23.587  | RhoA                                                                                          |
| AF036761    | 49.617  | stearoyl-CoA desaturase 2                                             | X02610        | 23.473  | non-neuronal enolase (NNE) (alpha-alpha enolase, 2-phospho-D-glycerate hydrolase EC 4.2.1.11) |
| X12744      | 47.901  | c-erb-A thyroid hormone receptor                                      | U73458        | 23.282  | protein tyrosine phosphatase (PTPNE6)                                                         |
| E13644cds   | 44.43   | Neurodap-1                                                            | D10770        | 23.119  | beta isoform of catalytic subunit of cAMP-dependent protein kinase                            |
| AB000362    | 40.85   | CIRP                                                                  | S83025        | 22.98   | TSH receptor suppressor element-binding protein-1                                             |
| rc_AA893065 | 38.352  | EST196868 Rattus norvegicus cDNA                                      | J00692        | 22.736  | skeletal muscle alpha-actin gene                                                              |
| AF001898    | 38.334  | aldehyde dehydrogenase (ALDH)                                         | AB016160      | 22.718  | AB016160                                                                                      |
| S59158      | 35.44   | glutamate transporter                                                 | L12382        | 22.672  | ADP-ribosylation factor 3                                                                     |
| U38653      | 35.344  | olfactory inositol 1,4,5-trisphosphate receptor (InsP3R)              | M27159cds     | 22.489  | potassium channel-Kv2                                                                         |
| rc_AI231213 | 33.851  | EST227901 Rattus norvegicus cDNA                                      | AB015432      | 22.324  | LAT1 (L-type amino acid transporter 1)                                                        |
| X73653      | 33.317  | tau protein kinase I                                                  | M92076        | 22.205  | metabotropic glutamate receptor 3                                                             |
| AB016160    | 33.304  | GABAB receptor 1c                                                     | M74494        | 22.191  | sodium/potassium ATPase alpha-1 subunit truncated isoform                                     |
| rc_AA924925 | 33.299  | UI-R-A1-eg-d-06-0-ULs1 Rattus norvegicus cDNA                         | L10326        | 22.047  | alternatively spliced GTP-binding protein alpha subunit (stimulatory) (GS-alpha)              |
| M36419      | 32.992  | glutamate receptor (GluR-B)                                           | X74402        | 21.966  | GDI alpha                                                                                     |
| AF036761    | 32.527  | <b>stearoyl-CoA desaturase 2</b>                                      | U35774        | 21.869  | cytosolic branch chain aminotransferase                                                       |
| rc_AA858621 | 32.32   | UI-R-E0-bq-b-10-0-ULs1 Rattus norvegicus cDNA                         | U14398        | 21.625  | synaptotagmin IV homolog                                                                      |
| L10362      | 31.279  | synaptic vesicle protein 2B (SV2B)                                    | M95735        | 21.429  | syntaxin B                                                                                    |
| AF074482    | 31.083  | GABA-B receptor 2 (GABA-BR2)                                          | AF089839      | 21.404  | N-ethylmaleimide sensitive factor                                                             |
| rc_AA858621 | 29.627  | UI-R-E0-bq-b-10-0-ULs1 Rattus norvegicus cDNA                         | AF083330      | 21.228  | kinesin-like protein KIF3C (KIF3C)                                                            |
| rc_AA891069 | 29.623  | EST194872 Rattus norvegicus cDNA                                      | rc_AA859990   | 20.85   | UI-R-E0-ca-a-08-0-ULs1 Rattus norvegicus cDNA                                                 |
| X53565      | 29.286  | trans-Golgi network integral membrane protein (TGN38)                 | L27075        | 20.701  | ATP-citrate lyase                                                                             |
| S75730      | 28.937  | stearoyl-CoA desaturase 2 SCD2 homolog                                | rc_AI639314   | 20.603  | rc_AI639314                                                                                   |
| rc_AA799406 | 28.111  | EST188903 Rattus norvegicus cDNA                                      | AB006451      | 20.527  | Tim23                                                                                         |

Continue Supplement table

| Accession   | F-value | Gene                                                                       | Accession   | F-value | Gene                                                           |
|-------------|---------|----------------------------------------------------------------------------|-------------|---------|----------------------------------------------------------------|
| AF022083    | 20.433  | guanine nucleotide binding protein beta 1 subunit                          | U42627      | 17.451  | dual-specificity protein tyrosine phosphatase (rVH6)           |
| S45812      | 20.196  | monoamine oxidase A                                                        | D14425      | 17.438  | calcineurin B                                                  |
| M36418      | 20.049  | glutamate receptor (GluR-A)                                                | D17521      | 17.399  | protein kinase C-regulated chloride channel                    |
| S81917      | 20.029  | cysteine string protein=34 kDa DnaJ-hsp40 heat shock-chaperone protein     | AF004017    | 17.353  | electrogenic Na <sup>+</sup> bicarbonate cotransporter (NBC)   |
| M16112      | 19.849  | type II Ca <sup>2+</sup> /calmodulin-dependent protein kinase beta subunit | U15408      | 17.35   | plasma membrane Ca <sup>2+</sup> -ATPase isoform 4             |
| U45479      | 19.665  | synaptojanin                                                               | AF037071    | 17.321  | carboxyl-terminal PDZ ligand of neuronal nitric oxide synthase |
| X12535cds   | 19.449  | ras-related protein p23                                                    | rc_AA957961 | 17.268  | UI-R-E1-fz-g-08-0-ULs1 Rattus norvegicus cDNA                  |
| AFFX_M      | 18.974  | Hexok                                                                      | rc_AI070521 | 17.114  | UI-R-Y0-iv-f-09-0-ULs1 Rattus norvegicus cDNA                  |
| rc_AII04035 | 18.797  | EST213324 Rattus norvegicus cDNA                                           | rc_AA891729 | 17.074  | EST195532 Rattus norvegicus cDNA                               |
| rc_AA894089 | 18.64   | EST197892 Rattus norvegicus cDNA                                           | X78327      | 16.979  | ribosomal protein L13                                          |
| rc_AA799538 | 18.613  | EST189035 Rattus norvegicus cDNA                                           | U08976      | 16.881  | Wistar peroxisomal enoyl hydratase-like protein (PXEL)         |
| rc_AA892378 | 18.58   | EST196181 Rattus norvegicus cDNA                                           | rc_AA859520 | 16.819  | UI-R-E0-br-b-02-0-ULs1 Rattus norvegicus cDNA                  |
| AF058795    | 18.574  | GABA-B receptor gb2                                                        | X76724      | 16.806  | RCK beta2                                                      |
| rc_AA893172 | 18.489  | EST196975 Rattus norvegicus cDNA                                           | U94189      | 16.689  | Duo                                                            |
| rc_AII72162 | 18.145  | EST218157 Rattus norvegicus cDNA                                           | U39320      | 16.589  | cysteine string protein                                        |
| rc_AII72162 | 18.145  | EST218157 Rattus norvegicus cDNA                                           | D10587      | 16.461  | 85kDa sialoglycoprotein (LGP85)                                |
| AF055065    | 18.085  | signal regulatory protein alpha                                            | rc_AI012805 | 16.458  | EST207256 Rattus norvegicus cDNA                               |
| L26268      | 17.814  | anti-proliferative factor (BTG1)                                           | rc_AI044508 | 16.372  | UI-R-C1-kc-a-07-0-ULs1 Rattus norvegicus cDNA                  |
| U62897      | 17.762  | carboxypeptidase D precursor (Cpd)                                         | rc_AA892801 | 16.306  | EST196604 Rattus norvegicus cDNA                               |
| AB012231    | 17.514  | NF1-B2                                                                     |             |         |                                                                |
